# Supplementary figures and images for: Temozolomide-Acquired Resistance Is Associated with Modulation of the Integrin Repertoire in Glioblastoma, Impact of α5β1 Integrin
Source: MDPI journal article supplement (doi:10.3390/cancers14020369), 2022-01-12

Sup. Figure S1

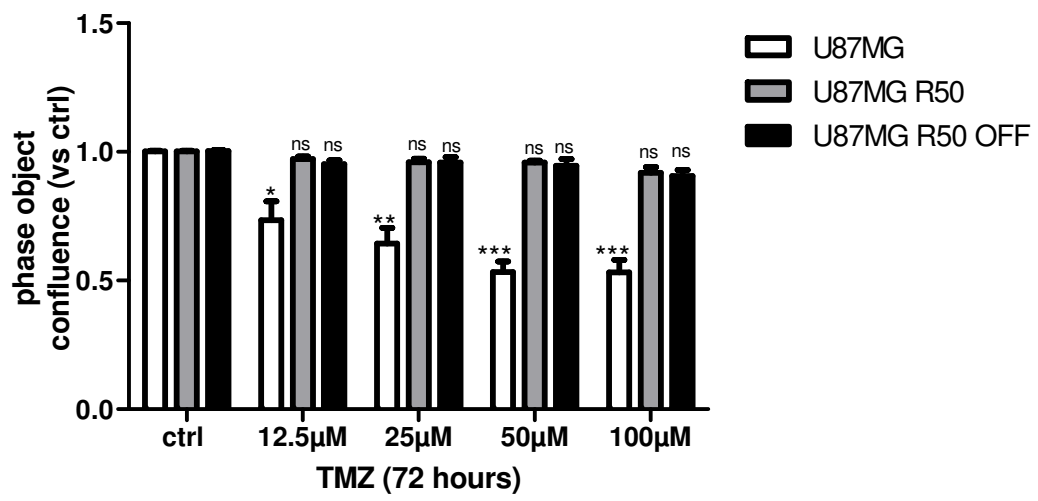

A

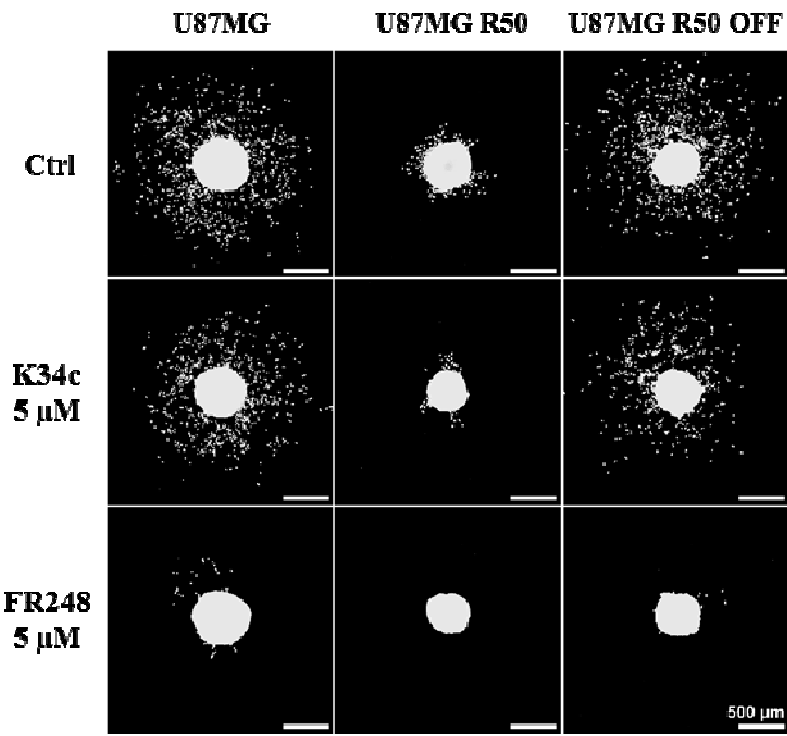

B

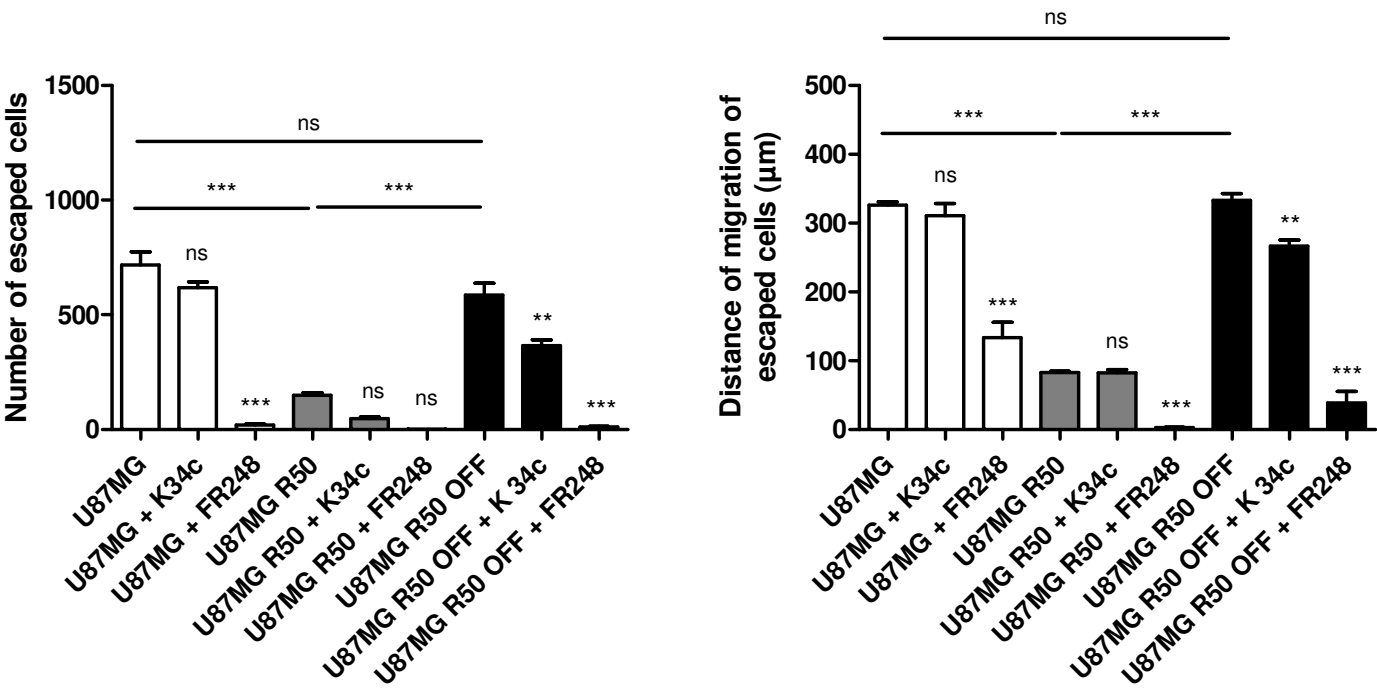

Sup. Figure S3

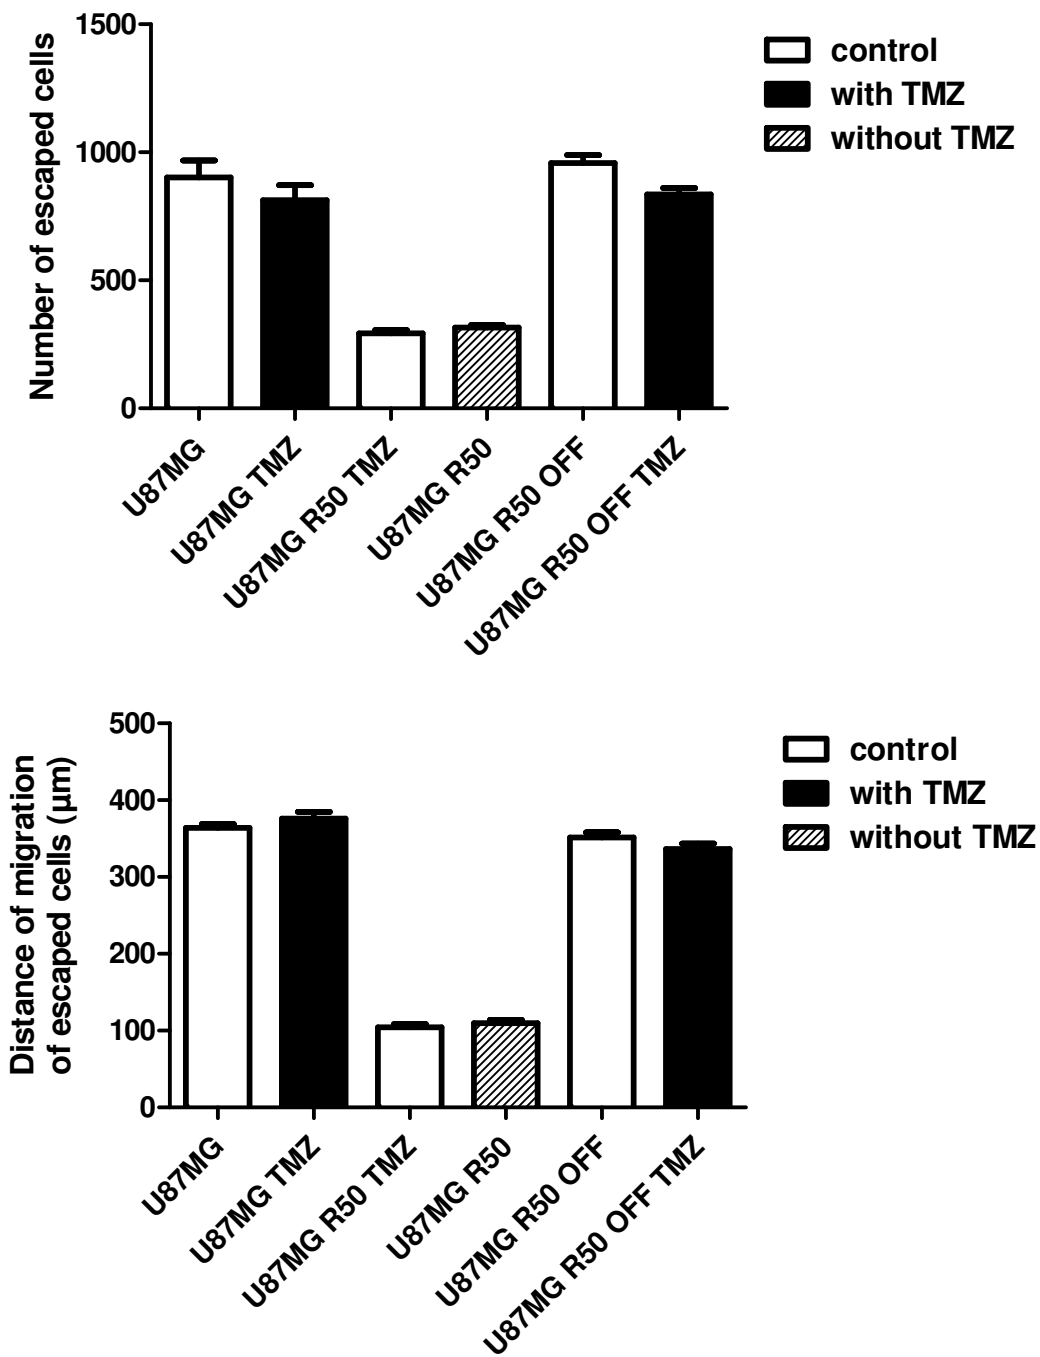

A

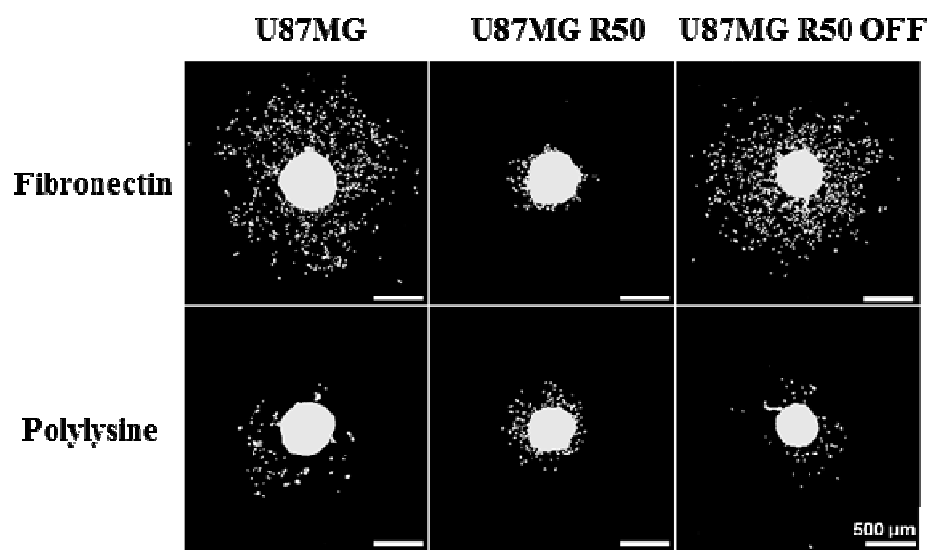

B

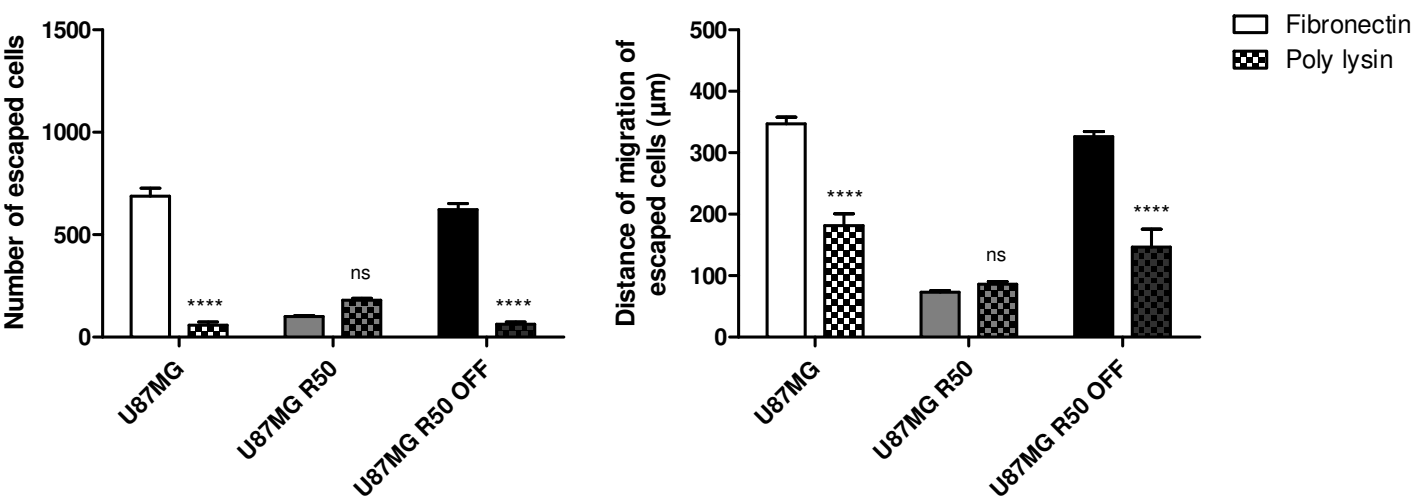

Sup. Figure S5

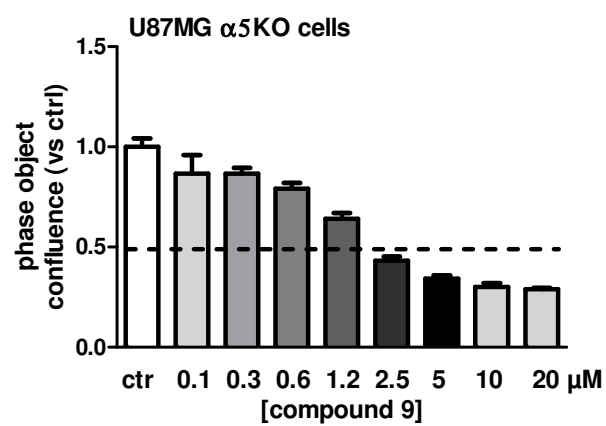

Supplement: s1 [file s1]
